# Supplementary material
Source: publisher figshare collection journal article supplement (https://acs.figshare.com/ndownloader/files/3875680)
Supplement: Supplementary file 1 [file 3875680]

# Estimating Collision Cross Sections of Negatively Charged *N*-Glycans using Travelling Wave Ion Mobility-Mass Spectrometry

*Johanna Hofmann*<sup>1</sup>, *Weston B. Struwe*<sup>2</sup>, *Charlotte A. Scarff*<sup>3</sup>, *James H. Scrivens*<sup>3</sup>, *David J. Harvey*<sup>3,4</sup>, *Kevin Pagel*<sup>1,5\*</sup>

## Supporting Information

<sup>1</sup> Department of Molecular Physics, Fritz Haber Institute of the Max Planck Society, Faradayweg 4-6, 14195 Berlin, Germany; <sup>2</sup>Department of Chemistry, Chemistry Research Laboratory, University of Oxford, South Parks Road, Oxford OX1 3TA, UK; <sup>3</sup>Department of Biological Sciences, University of Warwick, Coventry, CV47AL, UK; <sup>4</sup>Department of Biochemistry, University of Oxford, South Parks Road, Oxford OX1 3QU, UK; <sup>5</sup>Institute for Chemistry and Biochemistry, Free University Berlin, Takustrasse 3, 14195 Berlin, Germany.

\*correspondence should be addressed to Prof. Kevin Pagel, e-mail [kevin.pagel@fu-berlin.de](mailto:kevin.pagel@fu-berlin.de); phone +49 (0)30 838 72703; fax +49 (0)30 8413 5603

## Abstract and Table of Content

The supporting information contains detailed information about the experimental parameter of the glycan CCS measurements:

|                                                  |   |
|--------------------------------------------------|---|
| 1 Absolute CCS Measurements .....                | 2 |
| 2 TW IM-MS Measurements and CCS Estimation ..... | 3 |
| References .....                                 | 5 |

### 1 Absolute CCS Measurements

Measurement of absolute collision cross sections (CCS) were performed on a modified Synapt G1 HDMS (Waters, Manchester, UK) quadrupole-IM-MS instrument with a 18 cm long linear rf-confined drift tube which was described in detail previously.<sup>1</sup> IMS separation was followed by mass analysis using an orthogonal time-of-flight (ToF) mass analyzer. Typically, 5  $\mu$ L of sample were ionized using a nano-electrospray source (nESI) from platinum-palladium-coated borosilicate capillaries prepared in-house.<sup>2</sup> Settings for *N*-glycan and dextran measurements were: capillary voltage, 1.0-1.5 kV; sample cone 50 V, extractor cone 10 V; cone gas, 40 L/h; trap collision voltage, 10 V; trap DC bias, 25 V; IMS drift voltage, 50-150 V; backing pressure, 2-3 mbar; trap pressure,  $5.2 \times 10^2$  mbar (He),  $2.6 \times 10^2$  mbar (N<sub>2</sub>); ion mobility gas, He or N<sub>2</sub>; ion mobility cell pressure, 3.5 mbar (He), 0.87 mbar (N<sub>2</sub>); time-of-flight analyzer pressure,  $1.8-2.2 \times 10^6$  mbar. Data were processed using MassLynx software (Version 4.1, Waters, Manchester, UK) and OriginPro 8.5 (OriginLab Corporation, Northampton). In addition a self-written python script was used to extract the arrival time distributions (ATDs) of the relevant signals and to determine the drift times by fitting the ATDs with a Gauss distribution function.

CCS values were determined from the slopes of drift time versus reciprocal drift voltage plots as described previously. At constant temperature (*T*) and pressure (*p*), the velocity of the ions in

the IMS cell ( $v$ ) is directly proportional to their mobility ( $K$ ) and the applied electric field ( $E$ ) (Eq. 1).

$$v = KE \quad (1)$$

The drift time  $t_D$  that is needed to traverse a cell of length  $L$  is proportional to the inverse mobility ( $1/K$ ) as well as the inverse field ( $1/E$ ) (see Eq. 2). Each sample was measured at eight different drift voltages ranging from 50 to 150 V at two drift gasses (He and N<sub>2</sub>). By plotting the drift time  $t_D$  vs. the reciprocal drift voltage the mobility of an ion can be obtained from the slope of the linear regression (correlation coefficients typically above 0,9996). The intercept of the fit  $t_0$  corresponds to the time required to transport the ions from the end of the drift region into the mass analyzer.

$$t_D = \frac{L}{KE} + t_0 \quad (2)$$

From the obtained mobilities, absolute CCSs were calculated using the Mason-Schamp equation:<sup>3</sup>

$$CCS = \frac{3e}{16N} \sqrt{\frac{2\pi}{\mu k_B T}} \frac{1}{K} \quad (3)$$

where  $N$  is the drift gas number density,  $\mu$  the reduced mass of the ion and drift gas,  $k_B$  the Boltzmann constant and  $T$  the temperature. The reported CCSs represent averages of two replicates acquired in independent measurements.

## 2 TW IM-MS Measurements and CCS Estimation

Travelling wave (TW) IM-MS measurements were performed on a Synapt G2-S IM-MS instrument (Waters, Manchester, UK). The samples were diluted in water/methanol 1:1 (v:v) and

typically 5  $\mu\text{L}$  were sprayed from a platinum-palladium-coated borosilicate capillaries prepared in-house.<sup>2</sup>

Typical instrument settings were: capillary voltage, 0.8-0-1.0 kV; sample cone 125 V; source offset 100 V, source temperature, 60°C; trap collision voltage, 50 V; trap collision voltage, 2 V; helium cell gas flow, 180; IMS gas flow, 90 mL/min; wave velocity, 500, 550, 600, 650, and 700 m/s; wave height, 40 V; backing pressure, 3.8 mbar; trap pressure,  $2.3 \times 10^2$  mbar; ion mobility gas,  $\text{N}_2$ ; ion mobility cell pressure, 3.4 mbar; time-of-flight analyzer pressure,  $1.1 \times 10^6$  mbar. The instrument was mass-calibrated using a solution of caesium iodide (100 mg/mL) and the data were processed with MassLynx 4.1 software (Waters, Manchester, UK). ATDs of the relevant signals were manually extracted from raw data using DriftScope and MassLynx and fitted with a Gaussian distribution function using OriginPro.

CCS estimation was carried out as reported previously.<sup>1,4,5</sup> Briefly, the measured drift times were corrected for  $m/z$  dependent delay time in the instrument with  $c$  being an empirically determined constant ( $c = 0.001 \times \text{EDC delay coefficient}$ ).

$$t'_D = t_D - c \sqrt{m/z} \quad (4)$$

Absolute CCSs ( $\text{CCS}^{\text{DT}}$ ) were corrected for charge and reduced mass.

$$\text{CCS}' = \frac{\text{CCS}^{\text{DT}}}{z} \sqrt{\frac{1}{m_{\text{ion}}} + \frac{1}{m_{\text{gas}}}} \quad (5)$$

The plot of  $\ln(t'_D)$  against  $\ln(\text{CCS}')$  can be fitted with a linear regression (Eq. 6), with  $x$  being the slope and  $\ln A$  the intercept, and used as a calibration curve.

$$\ln(\text{CCS}') = x \ln(t'_D) + \ln A \quad (6)$$

When solved for  $\text{CCS}^{\text{DT}}$  with the addition of Eq. 5 estimated CCSs ( $\text{CCS}^{\text{DT}}$  now replaced with  $\text{CCS}^{\text{EST}}$ ) can be obtained from drift times measured on TW instruments.

$$\text{CCS}^{\text{EST}} = A \cdot z \cdot t_D' \times \sqrt{\frac{1}{m_{\text{ion}}} + \frac{1}{m_{\text{gas}}}} \quad (7)$$

Absolute  $\text{CCS}^{\text{DT}}$  served as calibrants to estimate  $\text{N}_2$  and pseudo He CCSs from TW IM-MS measurements in  $\text{N}_2$ .

To estimate CCSs, each sample was measured at five wave velocities on a Synapt G2-S instrument. For every wave velocity one calibration curve was generated and the resulting five estimated CCSs of one ion were averaged with typical standard deviations of 1%.

## References

- (1) Bush, M. F.; Hall, Z.; Giles, K.; Hoyes, J.; Robinson, C. V.; Ruotolo, B. T. *Anal. Chem.* **2010**, 82, 9557-9565.
- (2) Hernandez, H.; Robinson, C. V. *Nat. Protocols* **2007**, 2, 715-726.
- (3) Revercomb, H. E.; Mason, E. A. *Anal. Chem.* **1975**, 47, 970-983.
- (4) Ruotolo, B. T.; Benesch, J. L.; Sandercock, A. M.; Hyung, S. J.; Robinson, C. V. *Nat. Protoc.* **2008**, 3, 1139-1152.
- (5) Pagel, K.; Harvey, D. J. *Anal. Chem.* **2013**, 85, 5138-5145.
